# Supplementary material
Source: PubMed Central journal article supplement (PMC5457800)
Supplement: NIHMS857345-supplement-Supp.pdf [file NIHMS857345-supplement-Supp.pdf]

**Appendix from S. Hoban et al., “Finding the Genomic Basis of Local Adaptation: Pitfalls, Practical Solutions, and Future Directions”  
(Am. Nat., vol. 188, no. 4, p. 379)**

**Supplementary Material**

**Appendix Tables**

**Table A1:** A list of approaches to control for population structure in differentiation outlier tests, genetic-environment associations, and genome-wide associations with phenotype data

| Method of correcting for or estimating neutral structure                                | Approach                      | Differentiation outlier                                                                                                                                                                                 | Genetic-environment association                                      | Genome-wide association with phenotype                             | Pros                                                                                                                                                                                                                   | Cons                                                                                                                     |
|-----------------------------------------------------------------------------------------|-------------------------------|---------------------------------------------------------------------------------------------------------------------------------------------------------------------------------------------------------|----------------------------------------------------------------------|--------------------------------------------------------------------|------------------------------------------------------------------------------------------------------------------------------------------------------------------------------------------------------------------------|--------------------------------------------------------------------------------------------------------------------------|
| No correction for neutral structure                                                     | NA                            | NA                                                                                                                                                                                                      | SAM/MatSAM (Joost et al. 2007, 2008); CART (e.g., Jones et al. 2013) | Lasso-penalized logistic regression (multivariate; Wu et al. 2009) | Nonlinear (i.e., logistic) relationships can be modeled; CART makes no assumptions about distribution of the data                                                                                                      | High false positive rates because no correction for structure                                                            |
| Simulate null distribution                                                              | Demographic null model        | fidist2/LOSITAN (assumes island model; Beaumont and Nichols 1996; Antao et al. 2008); hierarchical island model (Excoffier et al. 2009b); specific scenario (e.g., range expansion; Eckert et al. 2010) | NA                                                                   | NA                                                                 | Can take into account sampling design and missing data                                                                                                                                                                 | Demographic history must be accurately captured by simulation                                                            |
| Bayesian hierarchical model, uses multinomial Dirichlet (or beta-binomial) distribution | Demographic null model        | BayeScan (Foll and Gaggiotti 2008); SelEstim (extension of BayeScan; Vitalis et al. 2014); specific scenario (e.g., paired sampling designs; Foll et al. 2014)                                          | Bayescenv (de Villemereuil and Gaggiotti 2015)                       | NA                                                                 | Dirichlet distribution is able to describe the distribution of allele frequencies over a wide range of demographic models, including unequal migration; can be a powerful approach if the underlying model is accurate | Assumes that the samples have not recently exchanged migrants; Bayesian models can be sensitive to priors; long run time |
| Matrix of covariance in allele frequencies among populations                            | Sample covariance/relatedness | Bayenv2 ( $X^T X$ ; Günther and Coop 2013); BayPass ( $X^T X$ ; Gautier 2015); Berg and Coop 2014 (multivariate)                                                                                        | Bayenv2; BayPass; Berg and Coop 2014 (multivariate)                  | BayPass                                                            | Explicitly accounts for evolutionary history among samples; can account for pool-seq ability to calculate covariance matrix from subset of SNPs; BayPass can account for LD using a genetic map                        | Bayesian models can be sensitive to priors; MCMC requires long run times; Bayenv2 assumes loci are not linked            |

|                                                                                                       |                 |                                                                                                |                                                                                                                                                                                            |                                                                                                                                                                 |                                                                                                                                                            |                                                                                                                                                                             |
|-------------------------------------------------------------------------------------------------------|-----------------|------------------------------------------------------------------------------------------------|--------------------------------------------------------------------------------------------------------------------------------------------------------------------------------------------|-----------------------------------------------------------------------------------------------------------------------------------------------------------------|------------------------------------------------------------------------------------------------------------------------------------------------------------|-----------------------------------------------------------------------------------------------------------------------------------------------------------------------------|
| Tree of population histories                                                                          | Population tree | FLK (Bonhomme et al. 2010); SOM/HMM (Jones et al. 2012)                                        | NA                                                                                                                                                                                         | NA                                                                                                                                                              | Explicitly accounts for evolutionary history among samples                                                                                                 | Closely related samples may be hard to resolve; user must supply or choose a population to root the tree; for SOM/HMM, approach has not been evaluated by simulation        |
| LMM with random effects for relatedness, covariance, and/or structure                                 | Mixed model     | NA                                                                                             | Methods on right have been used with environment instead of phenotype as response variable (e.g., Yoder et al. 2014)                                                                       | (Phenotype $\sim$ genotype); EMMAX (Kang et al. 2010); TASSEL (Bradbury et al. 2007); GCTA (Yang et al. 2011); LMM-Lasso (multi-variate; Raktitsch et al. 2013) | GWAS can be powerful for detecting polygenic (i.e., small) effects on phenotypes                                                                           | Using GWAS methods for environmental data (environment $\sim$ genotype) instead of phenotype has not been well evaluated                                                    |
| Latent factor models (random effects of population structure jointly estimated with main effects)     | Mixed model     | PCAdapt (Duforet-Frebourg et al. 2014; latent factors closely related to principal components) | LFMM (latent factors closely related to principal components; Fricot et al. 2013; Fricot and François 2015); gINLAnd (latent factors modeled as Gaussian; Guillot et al. 2014)             | NA                                                                                                                                                              | Ability to detect outliers along different axes of structure; computationally fast; gINLAnd allows spatial covariance to be calculated from subset of SNPs | For PCAdapt and LFMM, results may be sensitive to number of latent factors chosen by user; no missing data (missing genotypes must be imputed); assumes loci are not linked |
| Linear model with principal components as covariate                                                   | Mixed model     | NA                                                                                             | NA                                                                                                                                                                                         | EIGENSTRAT (Price et al. 2006)                                                                                                                                  | Computationally fast                                                                                                                                       | Results may be sensitive to number of principle components; no missing data                                                                                                 |
| Core distribution used to estimate parameters for neutral distribution                                | Other           | OutFLANK (Whitlock and Lotterhos 2015)                                                         | NA                                                                                                                                                                                         | NA                                                                                                                                                              | Computationally fast; low false-positive rates                                                                                                             | Assumes $F_{ST}$ follows $\chi^2$ distribution                                                                                                                              |
| Geographic distance matrix or geographic location used as predictor(s) or to calculate random effects | Mixed model     | NA                                                                                             | GDM (Ferrer and Guisan 2006; e.g., Fitzpatrick and Keller 2014); MAGICS (Raj et al. 2013); GEE (e.g., Poncet et al. 2010); GLMM and GAMM (Jones et al. 2013); SAMbADA (Stucki et al. 2014) | NA                                                                                                                                                              | Can model nonlinearities; can generate maps; in some cases, can use information criterion to rank competing models; GDM is computationally fast            | Geographic distance or location must accurately capture neutral structure; most of these approaches for detecting selection have not been well evaluated by simulation      |

**Table A1** (Continued)

| Method of correcting for or estimating neutral structure                                 | Approach                      | Differentiation outlier       | Genetic-environment association                                                                      | Genome-wide association with phenotype | Pros                                                                                                                                    | Cons                                                                       |
|------------------------------------------------------------------------------------------|-------------------------------|-------------------------------|------------------------------------------------------------------------------------------------------|----------------------------------------|-----------------------------------------------------------------------------------------------------------------------------------------|----------------------------------------------------------------------------|
| Moran's eigenvector map variables/<br>PCNM (Borcard and Legendre 2002; Dray et al. 2006) | Mixed model                   | NA                            | E.g., Fitzpatrick and Keller (2014) use to control structure in gradient forests (Ellis et al. 2012) | NA                                     | Can model nonlinearities; computationally fast; can generate maps                                                                       | Approach for detecting selection has not been well evaluated by simulation |
| Individual ancestry coefficients and geographic location                                 | Sample covariance/relatedness | TESS3 (Caye et al. 2016)      | NA                                                                                                   | NA                                     | Computationally fast; allows plotting of maps; deals with departures from HWE created by inbreeding or geographically restricted mating | Results may be sensitive to choice of number of ancestral populations      |
| Permutations                                                                             | Other                         | E.g., CSS (Jones et al. 2012) | NA                                                                                                   | NA                                     | Makes no assumptions about underlying distribution                                                                                      | Computationally slow and intensive                                         |

Note: We focus on approaches that have been used to detect selection from genome data (note that other landscape-genetic approaches for detecting gene flow or performing an isolation-by-environment analysis have been excluded). We summarize the pros and cons of each approach. CART = classification and regression trees; SNP = single nucleotide polymorphism; LD = linkage disequilibrium; MCMC = Markov chain Monte Carlo; SOM/HMM = self-organizing map-based iterative hidden Markov model; LMM = linear mixed model; GCTA = genome-wide complex trait analysis; GWAS = genome-wide association studies; LFMM = latent factor mixed models; GDM = generalized dissimilarity modeling; MAGICS = Mantel-generalized linear models to infer clinal selection; GEE = generalized estimating equations; GLMM = generalized linear mixed models; GAMM = generalized additive mixed models; PCNM = principal coordinate analysis of neighbor matrices; HWE = Hardy-Weinberg equilibrium; CSS = cluster separation score; NA = not applicable.

**Table A2:** List of reduced representation methods and corresponding references

| Reduced representation method              | References                                                                                                |
|--------------------------------------------|-----------------------------------------------------------------------------------------------------------|
| Exome-capture arrays                       | Bamshad et al. 2011                                                                                       |
| Custom sequence capture probes             | Jones and Good 2016                                                                                       |
| RNA sequencing                             | De Wit et al. 2012                                                                                        |
| Single nucleotide polymorphism chips       | Wang et al. 1998                                                                                          |
| Restriction site-associated DNA sequencing | Baird et al. 2008; Andolfatto et al. 2011; Elshire et al. 2011; Peterson et al. 2012; Puritz et al. 2014b |

**Table A3:** Data on sampling designs from published and simulation studies used to create figure A1

| EmpOrSim, abbreviation | Citation                          | Organism                                                                                         | No. individuals | No. populations | No. markers | Spatial scale | DOI                                  |
|------------------------|-----------------------------------|--------------------------------------------------------------------------------------------------|-----------------|-----------------|-------------|---------------|--------------------------------------|
| Emp:                   |                                   |                                                                                                  |                 |                 |             |               |                                      |
| Zu2014                 | Zueva et al. 2014                 | <i>Salmo salar L.</i> (Atlantic salmon)                                                          | 472             | 12              | 4,631       | 1,000         | 10.1371/journal.pone.0091672         |
| DA2014                 | Dell'Acqua et al. 2014            | <i>Brachypodium distachyon</i> (purple false brome grass)                                        | 96              | 9               | 16,697      | 800           | 10.1186/1471-2164-15-801             |
| Ge2014                 | Geraldes et al. 2014              | Admixture between <i>Populus trichocarpa</i> and <i>Populus balsamifera</i>                      | 498             | 30              | 33,070      | 3,000         | 10.1111/evo.12497                    |
| Be2015                 | Berg et al. 2015                  | <i>Gadus morhua</i> (Atlantic cod)                                                               | 194             | 7               | 8,809       | 700           | 10.1093/gbe/evv093                   |
| Ec2015                 | Eckert et al. 2015                | <i>Pinus lambertiana</i> (sugar pine)                                                            | 241             | 10              | 475         | 40            | 10.1007/s11295-015-0863-0            |
| Fr2015                 | Fraser et al. 2015                | <i>Poecilia reticulata</i> (guppies)                                                             | 153             | 8               | 7,757       | 20            | 10.1111/mec.13022                    |
| Gr2014                 | Gray et al. 2014                  | <i>Andropogon gerardii</i> (big bluestem grass)                                                  | 378             | 11              | 384         | 900           | 10.1111/mec.12993                    |
| Ha2014                 | Hamilton et al. 2015              | <i>Picea sitchensis</i> × <i>Picea glauca</i> and <i>Picea glauca</i> × <i>Picea engelmannii</i> | 1,492           | 40              | 71          | 3,000         | 10.1007/s11295-014-0817-y            |
| DK2014                 | De Kort et al. 2014               | <i>Alnus glutinosa</i> (black alder)                                                             | 356             | 24              | 1,990       | 1,200         | 10.1111/1365-2664.12305              |
| Zh2015                 | Zhou et al. 2014                  | <i>Pinus massoniana</i> and <i>Pinus hwangshanensis</i>                                          | 104             | 26              | 884         | NA            | 10.1111/mec.12830                    |
| Sim:                   |                                   |                                                                                                  |                 |                 |             |               |                                      |
| LW2015                 | Lotterhos and Whitlock 2014, 2015 | Simulation                                                                                       | 300             | 30              | 10,000      | NA            | 10.1111/mec.13100; 10.1111/mec.12725 |
| LW2015                 | Lotterhos and Whitlock 2014, 2015 | Simulation                                                                                       | 900             | 90              | 10,000      | NA            | 10.1111/mec.13100; 10.1111/mec.12725 |
| DM2013                 | De Mita et al. 2013               | Simulation                                                                                       | 100             | 100             | 1,100       | NA            | 10.1111/mec.12182                    |
| DM2013                 | De Mita et al. 2013               | Simulation                                                                                       | 384             | 8               | 1,100       | NA            | 10.1111/mec.12182                    |
| dV2014                 | de Villemereuil et al. 2014       | Simulation                                                                                       | 8,000           | 16              | 5,050       | NA            | 10.1111/mec.12705                    |
| Jo2013                 | Jones et al. 2013                 | Simulation                                                                                       | 300             | 100             | 100         | NA            | 10.1111/evo.12237                    |

Note: The empirical studies used in the table were made from a Google Scholar search on June 4, 2015, to obtain all citations of latent factor mixed models and Bayenv2 (both methods were published in 2013). This is not a comprehensive list but considered to be representative of the current literature.

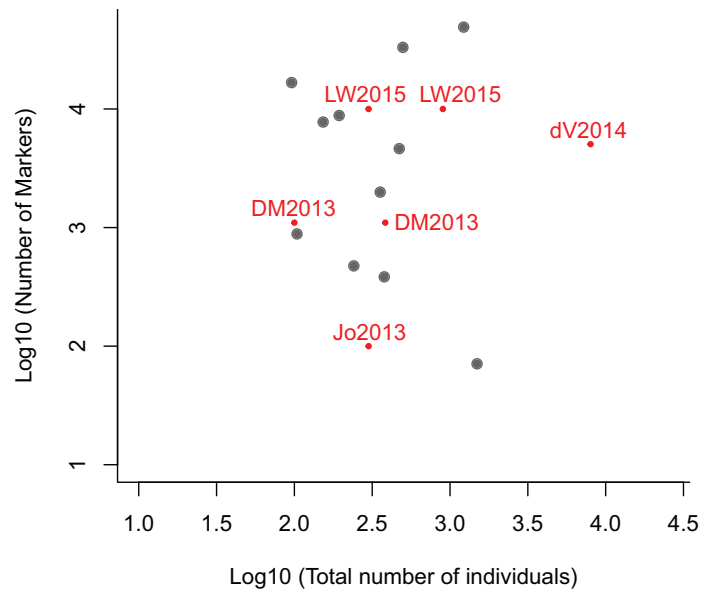

**Figure A1:** Examples of sampling designs from published studies (black dots) and from simulation studies (labeled red points; data available in table A3). LW2015 = Lotterhos and Whitlock 2015; DM2013 = De Mita et al. 2013; dV2014 = de Villemereuil et al. 2014; Jo2013 = Jones et al. 2013.
